# Supplementary material
Source: PubMed Central journal article supplement (PMC6563340)

**Supplemental Figure 1 Overall Survival by Risk Group**

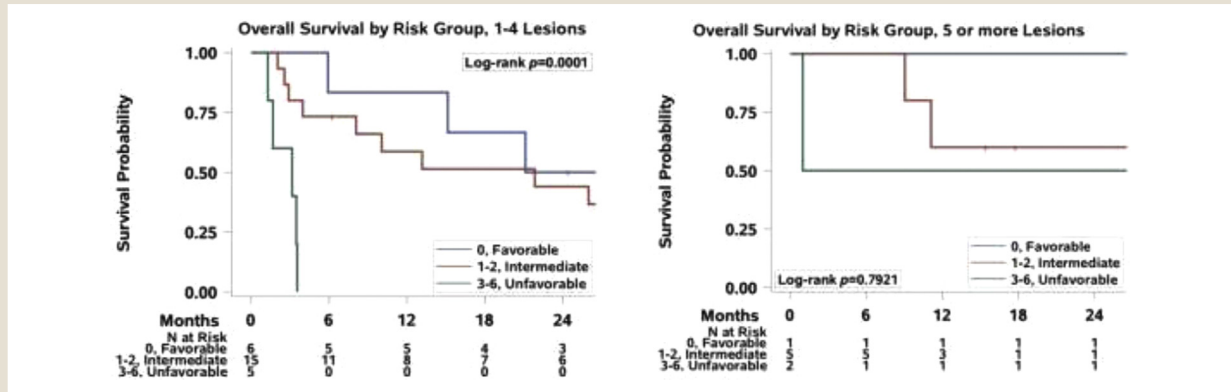

Supplement: NIHMS1032454-supplement-1.pdf [file NIHMS1032454-supplement-1.pdf]
